# Supplementary material for: Ouabain Reverts CUS-Induced Disruption of the HPA Axis and Avoids Long-Term Spatial Memory Deficits
Source: MDPI journal article supplement (doi:10.3390/biomedicines11041177), 2023-04-14
Supplement: s1 [file s1]

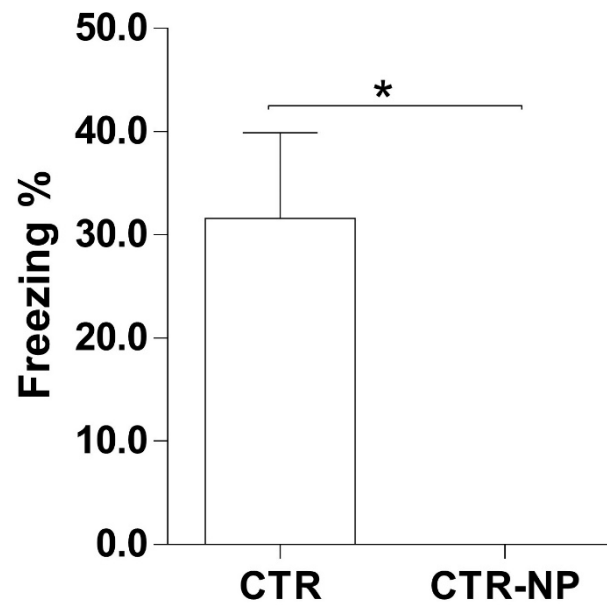

**Supplementary Figure S1.** Unpaired arena test. Results of analysis of behaviour in the unpaired test, where the CTR animals presented lower freezing when packed in the unpaired arena (n=4-10). Data are presented as mean  $\pm$  SEM. \* $p < 0.05$  when compared CTR  $\times$  CTR-NP. (t-student test was performed or two-way ANOVA followed by Newman-Keuls post hoc test revealed a significant).
